# Supplementary material for: Phyllostomid Bat Diversity of Tree Covers in the Tropical Agricultural Landscape, Ecuador
Source: Research Square preprint supplement (doi:10.21203/rs.3.rs-4535006/v1), 2024-06-26
Supplement: Supplementary file 1 [file b693df13397d928fb505c5ae.docx]

# Supplementary information

Phyllostomid bat species registered in non-common forms of tree cover (mixed tree covers), composed by two or three plantation types.

| **Species** | **PB** | **CB** | **CNY** | **CLT** | **Total** |
| --- | --- | --- | --- | --- | --- |
| *Carollia brevicaudum* | 20 | 1 | 4 |  | 25 |
| *Carollia perspicillata* | 4 | 3 |  | 9 | 16 |
| *Glossophaga soricine* | 2 | 7 |  | 5 | 14 |
| *Uroderma convexum* | 6 |  |  |  | 6 |
| *Sturnira bakeri* | 3 | 2 |  | 1 | 6 |
| *Sturnira Ludovici* | 1 |  | 3 |  | 4 |
| *Artibeus aequatorialis* | 1 | 1 | 1 |  | 3 |
| *Artibeus ravus* | 1 |  | 1 |  | 2 |
| *Chiroderma villosum* | 2 |  |  |  | 2 |
| *Trachops cirrhosis* | 1 |  |  |  | 1 |
| *Garderycteris crenulatum* | 1 |  |  |  | 1 |
| *Chiroderma salvini* | 1 |  |  |  | 1 |
| *Chiroderma* sp. | 1 |  |  |  | 1 |
| Total abundance | 44 | 14 | 9 | 15 | 82 |
| Rate of capture | 0.037 | 0.012 | 0.008 | 0.013 | 0.017 |
| No. of species | 13 | 5 | 4 | 3 | 13 |
| Diversity Shannon index | 1.11 | 0.70 | 0.60 | 0.48 | 1.11 |
| Eveness Pielou index | 0.43 | 0.43 | 0.43 | 0.43 | 0.43 |

PB= palm and banana in site 1, CB= cacao and banana in site 2, COY= cacao, orange and yucca in site 3, CLM = cacao, lemon and tangerine in site 4.
